# Supplementary material for: Rhizogenic Agrobacterium protein RolB interacts with the TOPLESS repressor proteins to reprogram plant immunity and development
Source: PubMed Central journal article supplement — Proc Natl Acad Sci U S A. 2023 Jan 12;120(3):e2210300120. doi: 10.1073/pnas.2210300120 (PMC9934019; doi:10.1073/pnas.2210300120), 2023-01-12
Supplement: pnas.2210300120.sapp.pdf [file pnas.2210300120.sapp.pdf]

## Supplementary Information for

### **Rhizogenic *Agrobacterium* protein RolB interacts with the TOPLESS and NINJA repressor proteins to reprogram plant jasmonate signaling**

Lore Gryffroy<sup>a,b</sup>, Evi Ceulemans<sup>a,b</sup>, Nicolás Manosalva Pérez<sup>a,b</sup>, Jhon Venegas-Molina<sup>a,b</sup>, Ana Cristina Jaramillo-Madrid<sup>a,b</sup>, Savio D. Rodrigues<sup>c</sup>, Liesbeth De Milde<sup>a,b</sup>, Veronique Jonckheere<sup>c</sup>, Marc Van Montagu<sup>a,b,\*</sup>, Barbara De Coninck<sup>c</sup>, Klaas Vandepoele<sup>a,b</sup>, Petra Van Damme<sup>d</sup>, and Alain Goossens<sup>a,b,\*</sup>

**\*Email:** marc.vanmontagu@ugent.be (M.V.M.) and alain.goossens@psb.vib-ugent.be (A.G.)

#### **This PDF file includes:**

- Supplementary Materials and methods
- Figures S1 to S10
- Tables S1
- Legends for Datasets S1 to S6
- SI References

#### **Other supplementary materials for this manuscript include the following:**

Datasets S1 to S6

## MATERIALS AND METHODS

**LC-MS/MS analysis.** Liquid chromatography-tandem mass spectrometry (LC-MS/MS) analysis was carried out by the VIB proteomics Core. In brief, purified peptides were redissolved in loading solvent A (0.1% [w/v] TFA in water/acetonitrile [98:2, v/v]) and the peptide concentration was determined on a Lunatic instrument (Unchained Lab). For the LC-MS/MS analysis, 2  $\mu\text{g}$  of peptides was injected on an Ultimate 3000 RSLCnano ProFLow system in-line connected to a Q Exactive HF mass spectrometer (Thermo Fisher Scientific). Trapping was done at 10  $\mu\text{L}/\text{min}$  for 4 min in loading solvent A on a 20-mm trapping column (made in-house, 100  $\mu\text{m}$  internal diameter, 5- $\mu\text{m}$  beads, C18 Reprisil-HD; Dr. Maisch, Germany). The peptides were separated on a 200-cm  $\mu\text{PAC}^{\text{TM}}$  column with C18-encapped functionality (Pharmafluidics, Belgium) kept at a constant temperature of 50°C. Peptides were eluted by a nonlinear gradient reaching 55% MS solvent B (0.1% [w/v] TFA in water/acetonitrile [2:8, v/v]) in 80 min, and 97% MS solvent B in 90 min at a constant flow rate of 300 nL/min, followed by a 5-min wash at 97% MS solvent B and reequilibration with MS solvent A (0.1% [w/v] TFA in water). The mass spectrometer was operated in data-dependent mode, automatically switching between MS and MS/MS acquisition for the 12 most abundant ion peaks per MS spectrum. Full-scan MS spectra (375-1500  $m/z$ ) were acquired at a resolution of 60,000 in the Orbitrap analyzer after accumulation to a target value of 3,000,000. The 12 most intense ions above a threshold value of 13,000 were isolated for fragmentation at a normalized collision energy of 30% after filling the trap at a target value of 100,000 for maximum 80 ms. MS/MS spectra (200-2000  $m/z$ ) were acquired at a resolution of 15,000 in the Orbitrap analyzer.

**Yeast two- and three-hybrid assays.** Y2H assays were done as previously described (1). Briefly, bait and prey entry constructs were cloned into pGBT9/pGBKT7 and pGADT7 Gateway-compatible destination vectors. The *Saccharomyces cerevisiae* yeast strain PJ69-4A was cotransformed with a bait and a prey plasmid by means of the lithium acetate/single-stranded carrier DNA/polyethylene glycol (LiAc/ssDNA/PEG) method and selected on yeast synthetic defined (SD) medium lacking Leu and Trp. To verify that constructs did not autoactivate, empty pGBT9/pGBKT7 and pGADT7 vectors were used as controls. Three independent transformants were selected for replica plating in 10 $\times$  and 100 $\times$  dilutions and grown on SD medium lacking Leu, Trp, and His for 2 days at 30°C.

For Y3H assays, the 'bridge' construct was generated through recombination of the entry clones pEN-L4-GPD-R1, pEN-R2-NLS-3 $\times$ FLAG-6 $\times$ His-L3, and pEN-L1-ORF-L2 with the MultiSite

Gateway cloning with pMG426 as destination vector. Y3H was carried out as described above, except that the transformed yeast cells were selected on SD medium lacking Leu, Trpn and Ura.

**Transient expression assay.** Transient expression assays were carried out as previously described (2). Tobacco (*Nicotiana tabacum*) protoplasts were prepared and cotransfected with a reporter construct expressing the Firefly luciferase (fLUC) driven by a promoter containing the GAL4 upstream-activating sequences (UASs) and a construct expressing the gene of interest fused to the GAL4-DBD under the control of the constitutive CaMV35S promoter. In several experiments, effector constructs were added, cloned into the p2GW7 Gateway-compatible destination vector for overexpression. As a control, GUS was cloned into the pGAL4-DBDgate or p2GW7. For each experiment, 2 µg of each plasmid was used. Transfected protoplasts were incubated overnight and lysed. fLUC activities were determined with the Dual-Luciferase reporter assay system (Promega).

**Tomato composite plant bioassay.** Tomato composite plant bioassays were carried out as previously described with some adaptations (3). More specifically, the WT rhizogenic *Agrobacterium* K599 (NCPBP2659; pRi2659) strain and the K599 strain mutated in the *rolB* oncogene through base editing, were used to infect tomato seedlings (4). Both K599 strains were transformed as previously described with a plasmid expressing the mCherry fluorescent reporter under the control of the constitutive CaMV35S promoter from its T-DNA (5). In several experiments, the mCherry reporter construct was replaced by the pK7WG2D Gateway-compatible binary destination vector expressing a gene of interest under the control of the constitutive CaMV35S promoter and the GFP fluorescent marker under the control of the *pRolD* promoter from its T-DNA region.

Per strain, ~30 tomato seedlings were infected as previously described (3). Three and 4 weeks post-infection, the percentage of fluorescent transgenic roots was determined (for instance, 50% transgenic roots corresponded to 15 out of 30 tomato seedlings with fluorescent transgenic roots) under a fluorescence microscope (Leica).

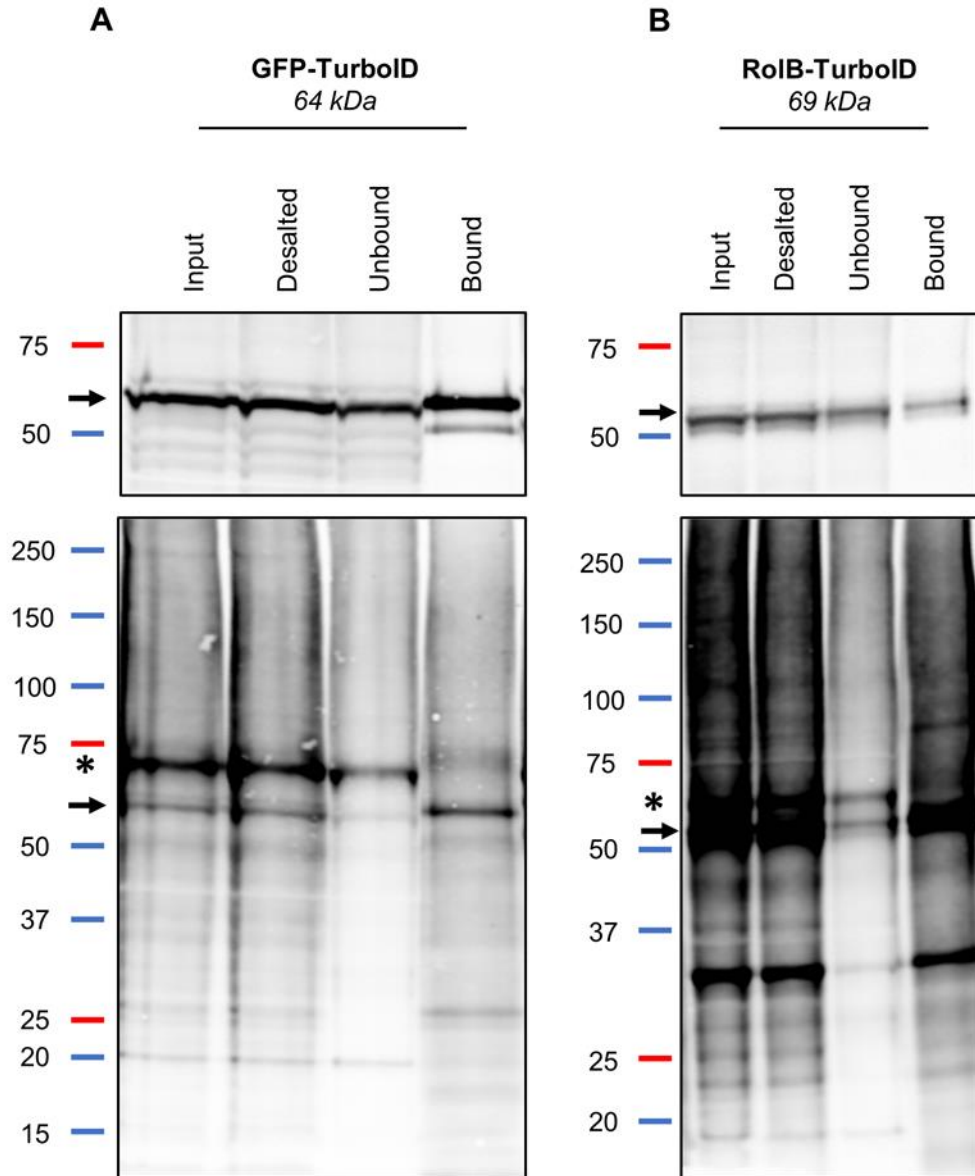

**Fig. S1.** Protein expression and biotinylation activity of Bait-TurboID fusion proteins. Constitutive *pCaMV35S::eGFP-TurboID* and  $\beta$ -estradiol-inducible *pXVE::RolB-TurboID* expression constructs used for rhizogenic *Agrobacterium*-mediated transformation of tomato. Before the protein extracts from transformed hairy roots were submitted to TurboID-MS, the quality of the TurboID-MS sample preparation was assessed by exposing the input, input desalted, unbound, and bound fractions collected at various steps of the procedure to an immunoblot analysis. (A) Immunoblot results of input, input desalted, unbound and bound fractions for the eGFP-TurboID fusion protein (64 kDa) and (B) for the RolB-TurboID fusion protein (69 kDa). A streptavidin/Alexa Fluor™ 680 conjugate was used for the detection of biotinylated proteins (bottom panels), and anti-Flag for the detection of the translational fusion of the promiscuous labeling enzyme TurboID to the bait (top panels). Arrows indicate the molecular mass of the fusion proteins. Asterisks mark TurboID-catalyzed autoubiotinylation of the fusion proteins. Results are representative for the three biological TurboID replicate samples.

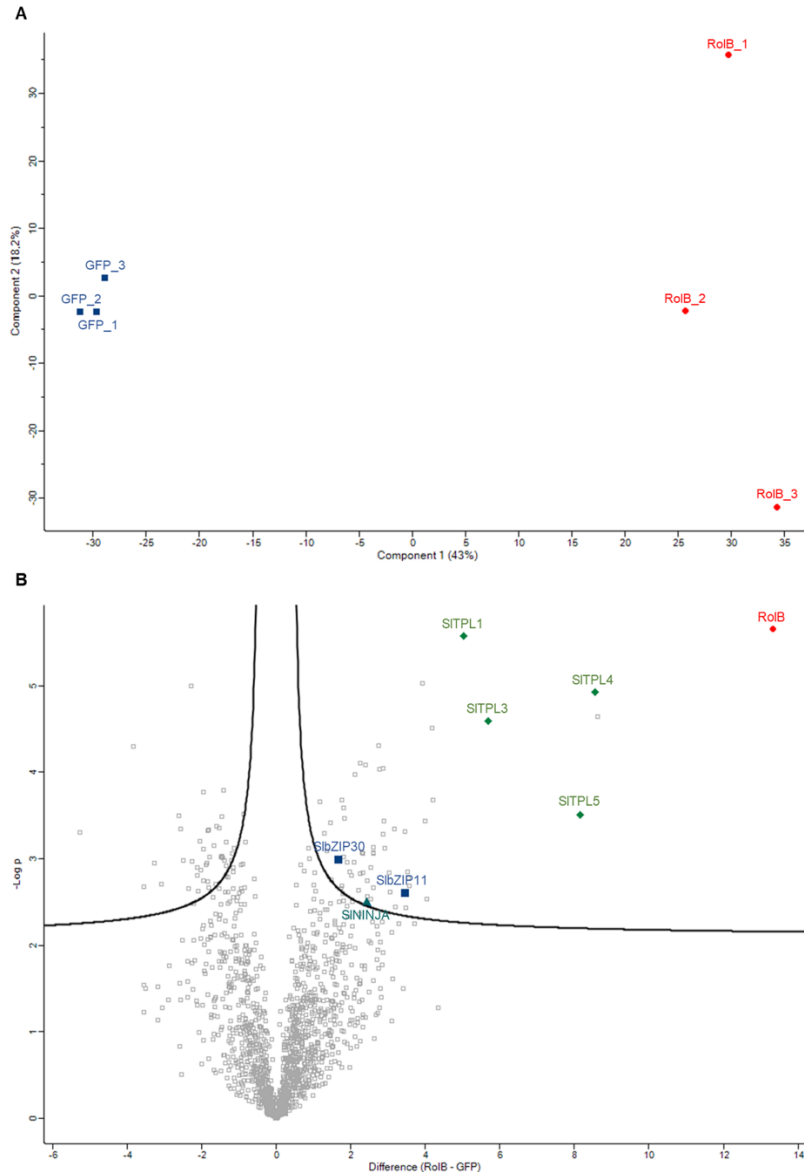

**Fig. S2.** Statistical analysis on RoIB and eGFP TurboID samples. *35S::GFP-TurboID* and *XVE::rolB-TurboID* expression constructs were used for rhizogenic *Agrobacterium*-mediated transformation of tomato. Transformed hairy roots were treated with  $\beta$ -estradiol (100  $\mu$ M) for 24 h and biotin (50  $\mu$ M) for 2 h. Proteins were extracted from the hairy root tissue, followed by streptavidin beads enrichment, trypsin digest, and identification by mass spectrometry. The MaxQuant software was used for peptide and protein identification on the acquired raw files and the Perseus software for statistical data analysis (69, 70). (A) Variability of samples represented by a principal component analysis (PCA) plot. Red circles and blue squares, RoIB and eGFP replicate samples, respectively. (B) Volcano plot of pairwise comparison between RoIB and eGFP samples. A two-sample Student's *t* test was done to identify enriched proteins in the RoIB samples. The full line indicates the cut-off at false discovery rate (FDR)=0.01 and  $S_0=0.1$  (i.e. artificial within groups variance; this value defines the relative importance of the *P* value and difference between means). The *t* test difference was plotted versus the *t* test  $-\log(P$  value). Direct and indirect interactors of RoIB are highlighted in the volcano plot. Red circle, RoIB; light-blue triangle, SININJA (Solyc05g018320); dark-green diamonds, TPL family proteins (SITPL1 [Solyc03g117360], SITPL3 [Solyc01g100050], SITPL4 [Solyc03g116750], and SITPL5 [Solyc07g008040]); dark-blue squares, bZIP family proteins (SlbZIP11 [Solyc01g110480] and SlbZIP30 [Solyc04g071160]).

```

K599  MALNLPLFHSYPQPHITMPPRL LFLQRFQPRDLTKAWNQLNLFNEIQFAFLIYSQVYSKTLMD FQKRWAQ 70
ATCC15834 -----
1724  MALNLPLFHSYPQPHITMAPRS LFLQRFQPRDLTKAWNQLNLFDEIQFAFLIYSQVYSKTLMD FQKRWAQ 70
A4    -----
8196  -----MPTHMHFLPRFYPRNLTAWNQINLCEEIRFAFITYSQVYVYGKTLMEYQKGWAR 53
      EAR1

K599  GVL DLEENRPPV VILKQLAHL LKNKVCYHPPMLVDQ PDLARENDRHVFVYLSREKMQKVL EEKSITFGLE 140
ATCC15834 -----
1724  GVL DLEENAPPV VILKQLAHL LKNKVCYHPPMLVDH PDLARENDRHVFVYLSREKMQKVL EEKSITFGLE 140
A4    AVLDLKENSPP IYILKQLAE LLKNKVCYHPPMFVS QPDLARENDRHVFVYLSREKMQKVL EEKSITFGLE 123
8196  DVLELEENSPP VNILKQLAQ ILKDQLCYHRP MFVSQPDLAREREQHVFVYLSREKMQKVL REQSITFGLE 123

K599  AVLATTM QPYRSD LALQEMVRAHNI AWPHRRVEEPDLEGFIAIFASTLFIH LLELKVTVN VYGREACTFF 210
ATCC15834 AVLATTI QPYRSE LALQEMLRVHNLAWPHSRTEEPDLECFIAIFASSLFIH LLELKVTVN VYGREACTFF 109
1724  AVLATTM QPYRSD LVLQEMVRAHNI AWPHRRVEEPDLEGFIAIFASTLFIH LLELKVTVN VYGREACTFF 210
A4    AVLATTI QPYRSE LALQEMLRVHNLAWPHSRTEEPDLECFIAIFASSLFIH LLELKVTVN VYGREACTFF 193
8196  AVVATTI QPYRCD LSVKALLHAHNLAWPLRRMVKSDLECFIAIFASTL FVHLLLEAKL TNL YGREAPCAFF 193

K599  VRQGTGNRSYDVIACG ITQFTKNAGVM PRPAVPSPEPDLTLRLSGPNQKREEGDMKPAIVNLK KETSAT 279
ATCC15834 LRRGTENR PYDVVACG TTQFTKNALGISRPAAS SPEPDLTLRLSGPDQEGEEGV MKPAAVNLKKEA --- 175
1724  VRQGTGNRSYDVIACG ITQFTKNAGVM PRPAVPSPEPDLTLRLSGPNQKREEGDMKPAIVNLK KETSAT 279
A4    LRRGTENR PYDVVACG TTQFTKNALGISRPAAS SPEPDLTLRLSGPDQEGEEGV MKPAAVNLKKEA --- 259
8196  VRLGTENRRYDVIACGLTKFDESDCV VPPAAA--QPDLNRLS---VQSEEDVMHKPEI VYPKNEA --- 254
      EAR2

```

**Fig. S3.** Conservation of the EAR2 motif in the RolB protein. Alignment of the amino acid sequences of RolB homologs from five rhizogenic *Agrobacterium* strains, comprising the EAR1 and EAR2 motifs found in K599 RolB (red underlined). Residues are highlighted (yellow); when a majority or all amino acid residues are identical. The sequences used for the alignment were collected from the National Center for Biotechnology Information sequence database. Proteins and their accession numbers are: RolB\_K599 (CAB65895), RolB\_ATCC15834 (KEA04442), RolB\_1724 (P49409), RolB\_A4 (P20402), and RolB\_8196 (AAA22095). Image created by Snappgene.

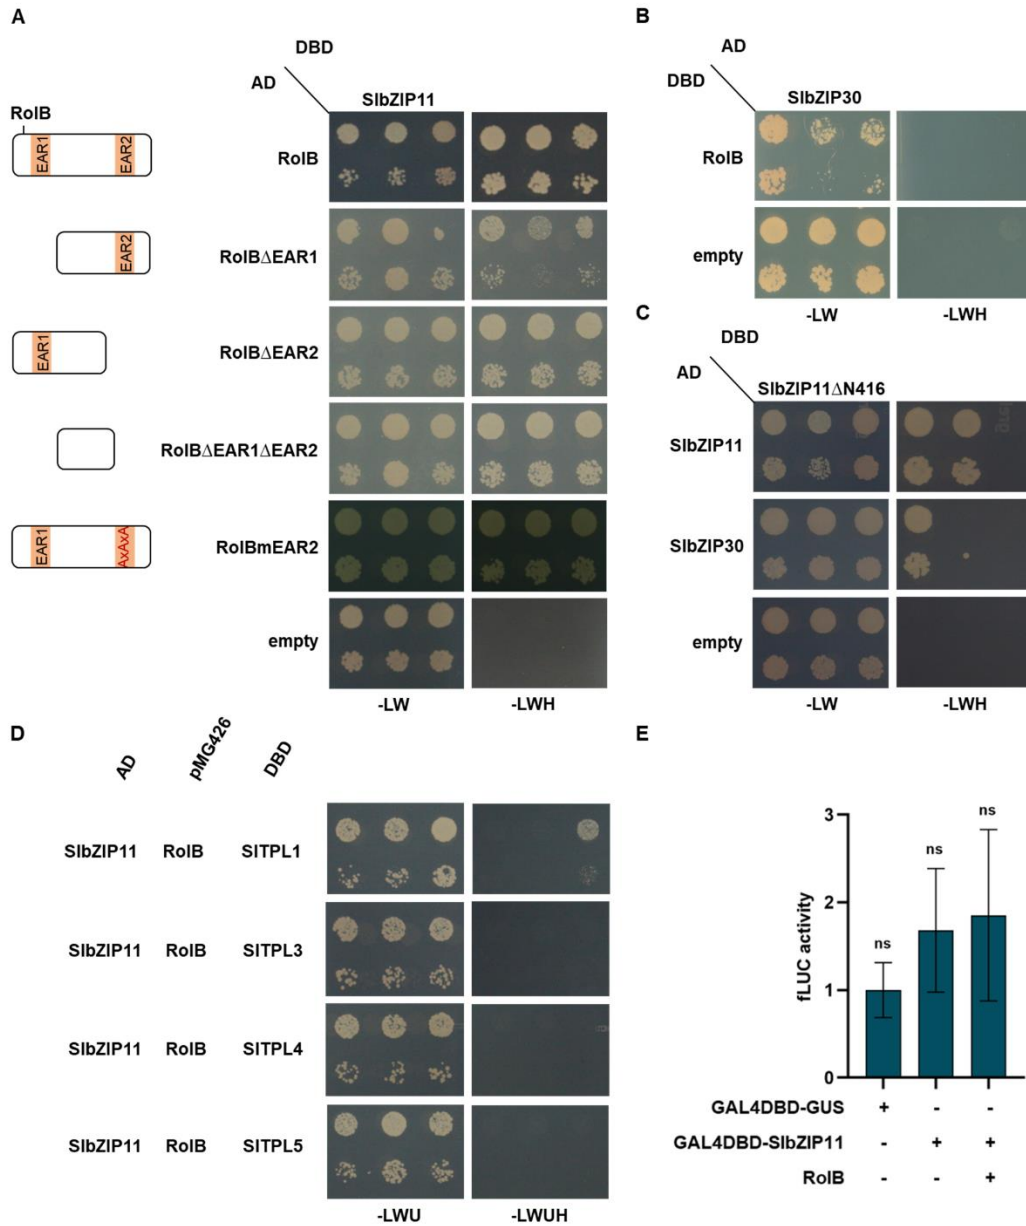

**Fig. S4.** Direct interaction of RoIB with SlbZIP11. (A) Y2H assay with RoIB derivatives as baits and SlbZIP11 (Solyc01g110480) as prey. Y2H analysis was done as in Fig. 1. (B) Y2H assay with SlbZIP30 (Solyc04g071160) as bait and RoIB as prey. (C) Y2H assay with SlbZIP11 $\Delta$ N416 as bait and SlbZIP11 and SlbZIP30 as preys. To avoid autoactivation, a truncated version of SlbZIP11, SlbZIP11 $\Delta$ N416, lacking the first 416 amino acids, was generated and used as the bait. (D) Y3H analysis with tomato TPL homologs as baits, SlbZIP11 as prey, and RoIB as ‘bridge’ protein. Transformed yeasts were spotted in 10-fold and 100-fold dilutions on control medium (-Leu-Trp-Ura [-LWU]) and selective medium (-Leu-Trp-Ura-His [-LWUH]). Gene constructs in the pGBT9 and pGADT7 vectors carry the GAL4- DNA-binding domain (DBD) or the transcription activation domain (AD), respectively, whereas the constructs expressed in pMG426 do not carry any additional domain. (E) Transactivation activity in tobacco protoplasts transfected with a *pUAS-fLUC* reporter construct, a SlbZIP11 construct fused with GAL4-DBD, and a RoIB construct. Values represent the mean  $\pm$  SE ( $n=8$ ) relative to a control transfection with a GAL4-DBD-GUS control construct. Statistical significance was assessed using one-way ANOVA with Tukey’s honest significance difference (ns, not significant).

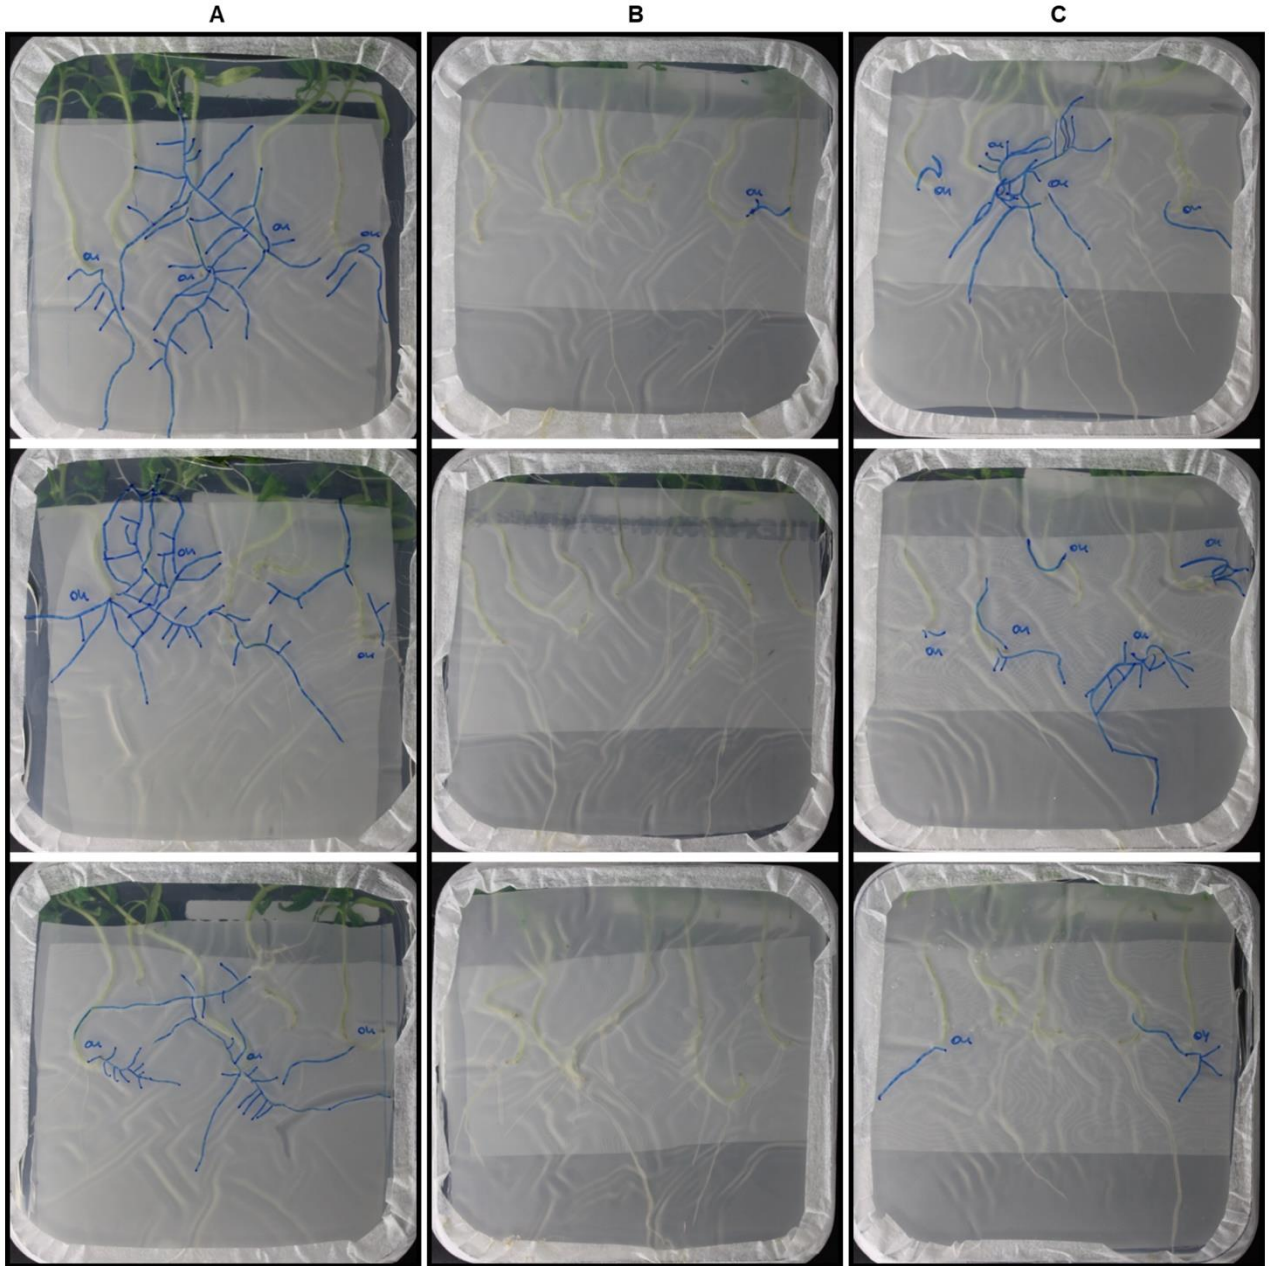

**Fig. S5.** Pictures of a representative outcome of a tomato infection assay with rhizogenic *Agrobacterium*. Shown are tomato seedlings 4r weeks post-infection with either (A) the rhizogenic *Agrobacterium* K599 wild-type strain, (B) the *rolBA* mutant strain, or (C) the *rolBA* strain transformed with a construct expressing the native *rolB* oncogene. For each strain, three square Petri dishes are shown, each containing five tomato seedlings. Tomato plants with transgenic fluorescent roots are marked with 'OK' and transgenic roots are highlighted in blue.



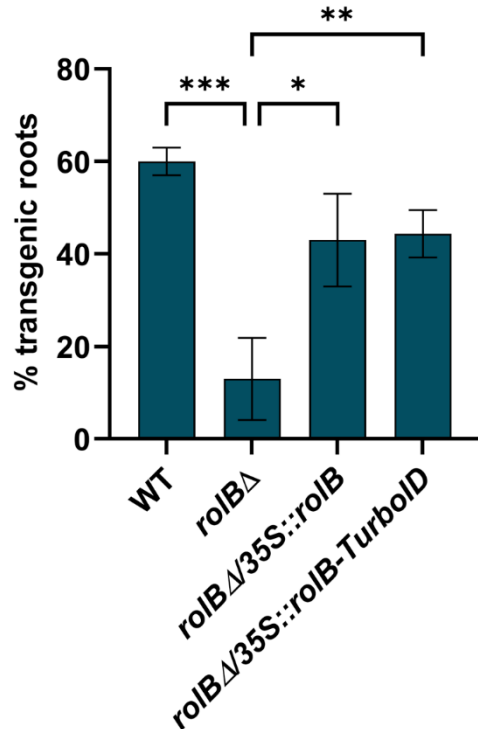

**Fig. S6.** Functional analysis of the RolB-TurboID fusion protein. Tomato seedlings (~30 seedlings per strain) were infected with rhizogenic *Agrobacterium* K599 strain variants and the percentage of emerging fluorescent transgenic roots was scored 4 weeks post-infection. Percentage of transgenic fluorescent tomato roots upon infection with the rhizogenic *Agrobacterium* K599 wild-type (WT) strain, the *rolB*Δ mutant strain, and the *rolB*Δ strain transformed with a construct expressing either the native *rolB* oncogene or the native *rolB* oncogene N-terminally fused to TurboID, each under the control of the constitutive *CaMV35S* promoter, along with a *GFP* fluorescent reporter gene, *rolB*Δ/35S::*rolB* and *rolB*Δ/35S::*rolB*-TurboID, respectively. The WT and *rolB*Δ strain were transformed with a construct expressing the *mCherry* fluorescent reporter gene. Values represent the mean ± SE ( $n=3$ ). Statistical significance was assessed with one-way ANOVA with Tukey's honest significance difference (\*\*\*)  $P \leq 0.001$ ; \*\*  $P \leq 0.01$ ; \*  $P \leq 0.05$ ).

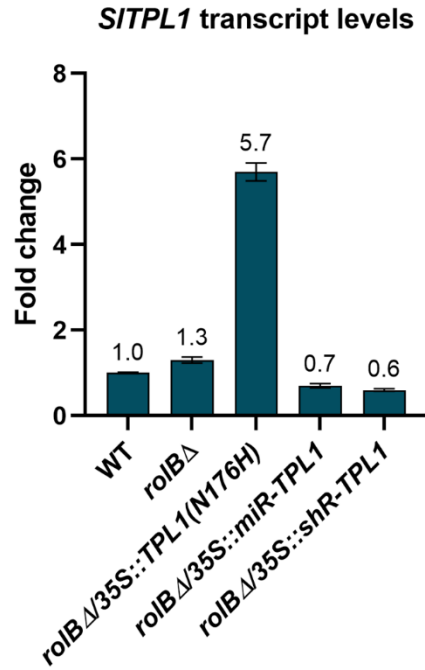

**Fig. S7.** Analysis of the *SITPL1* expression in roots infected with gain- or loss-of-function constructs. qRT-PCR analysis reflects the fold-change in steady-state *SITPL1* transcript levels in transformed tomato roots, 4 weeks post infection with the *rolB*Δ strain transformed with either the *SITPL1* silencing constructs *microRNA(miR)-SITPL1* and *short hairpin RNA(shR)-SITPL1*, or a construct carrying a dominant negative mutant version of the *SITPL1* gene, *SITPL1(N176H)*. Fold change is relative to the transcript levels in roots upon K599 WT infection and normalized to the *SICAC (Solyc08g006960)* transcript levels. Given the lack of complementation with any of the constructs, the assay was not repeated, hence  $n=1$  without error bars.

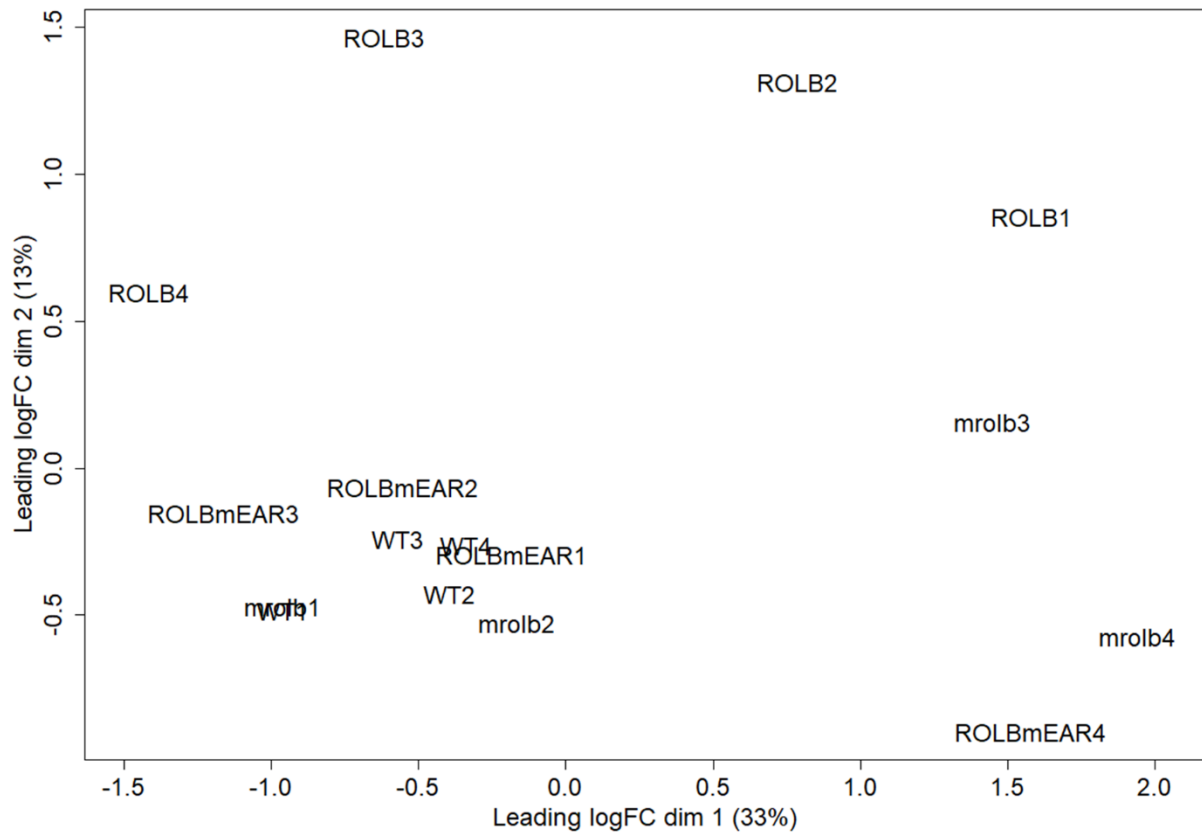

**Fig. S8.** RNA sequencing of tomato roots infected with the WT K599 strain, the *rolB* $\Delta$  strain, and the *rolB* $\Delta$  strain with a construct expressing either the native *rolB* oncogene or the *rolBmEAR2* mutant, each under the control of the constitutive *CaMV35S* promoter, *rolB* $\Delta$ /*35S*::*rolB*, and *rolB* $\Delta$ /*35S*::*rolBmEAR2*, respectively. Principal component analysis (PCA) plot showing the variance between all samples. WT, wild-type K599-infected tomato root samples; mrolb, *rolB* $\Delta$ -infected tomato root samples; ROLB, *rolB* $\Delta$ /*35S*::*rolB*-infected tomato root samples; ROLBmEAR, *rolB* $\Delta$ /*35S*::*rolBmEAR2*-infected tomato root samples. Each point represents a sample and each sample group consists of four biological replicates.

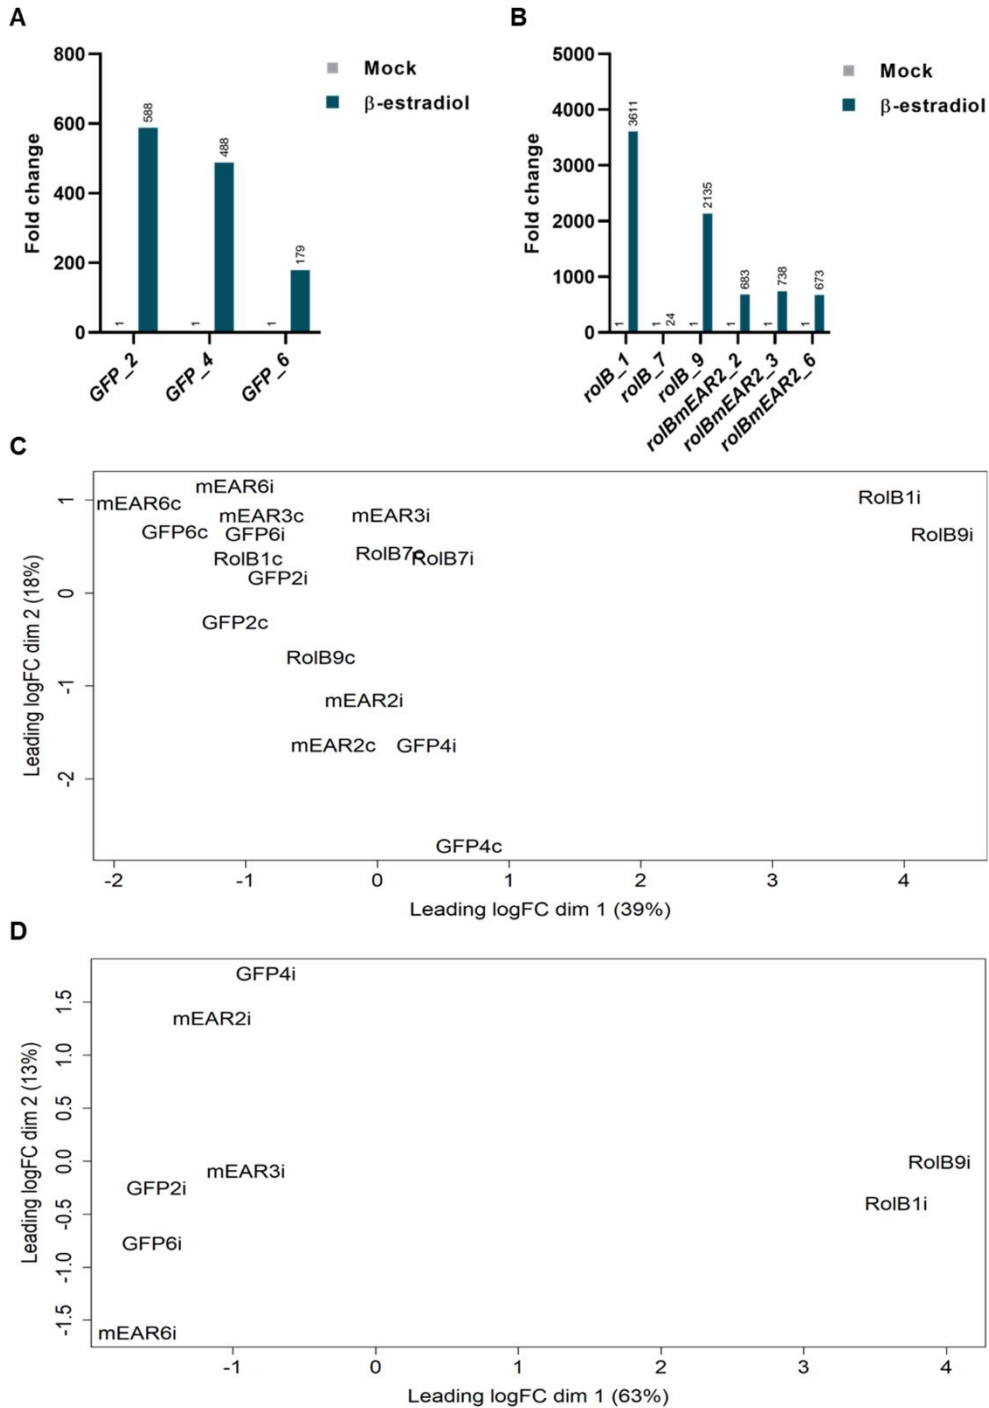

**Fig. S9.** RNA sequencing on *rolB*, *rolBmEAR2*, and *GFP* transgenic tomato hairy root lines after 24 h of mock and 100  $\mu$ M  $\beta$ -estradiol treatments. (A) and (B) Preliminary assessment by qRT-PCR of *GFP* and *rolB* transcript levels in transformed hairy roots, respectively. Fold change is relative to the transcript levels in mock-treated hairy roots and normalized to the *SICAC* (*Solyc08g006960*) transcript levels. (C) Principal component analysis (PCA) plot showing the variance between all samples. Each point represents a sample and each sample group consists of three biological replicates. c, mock-treated (control) samples; i,  $\beta$ -estradiol-induced samples. (D) PCA plot showing the variance between the  $\beta$ -estradiol-induced samples. One sample was removed from the analysis (pRPS5 $\alpha$ \_XVE::*rolB*, line 7; RolB7i), because of divergent correlation coefficients (see panel C).

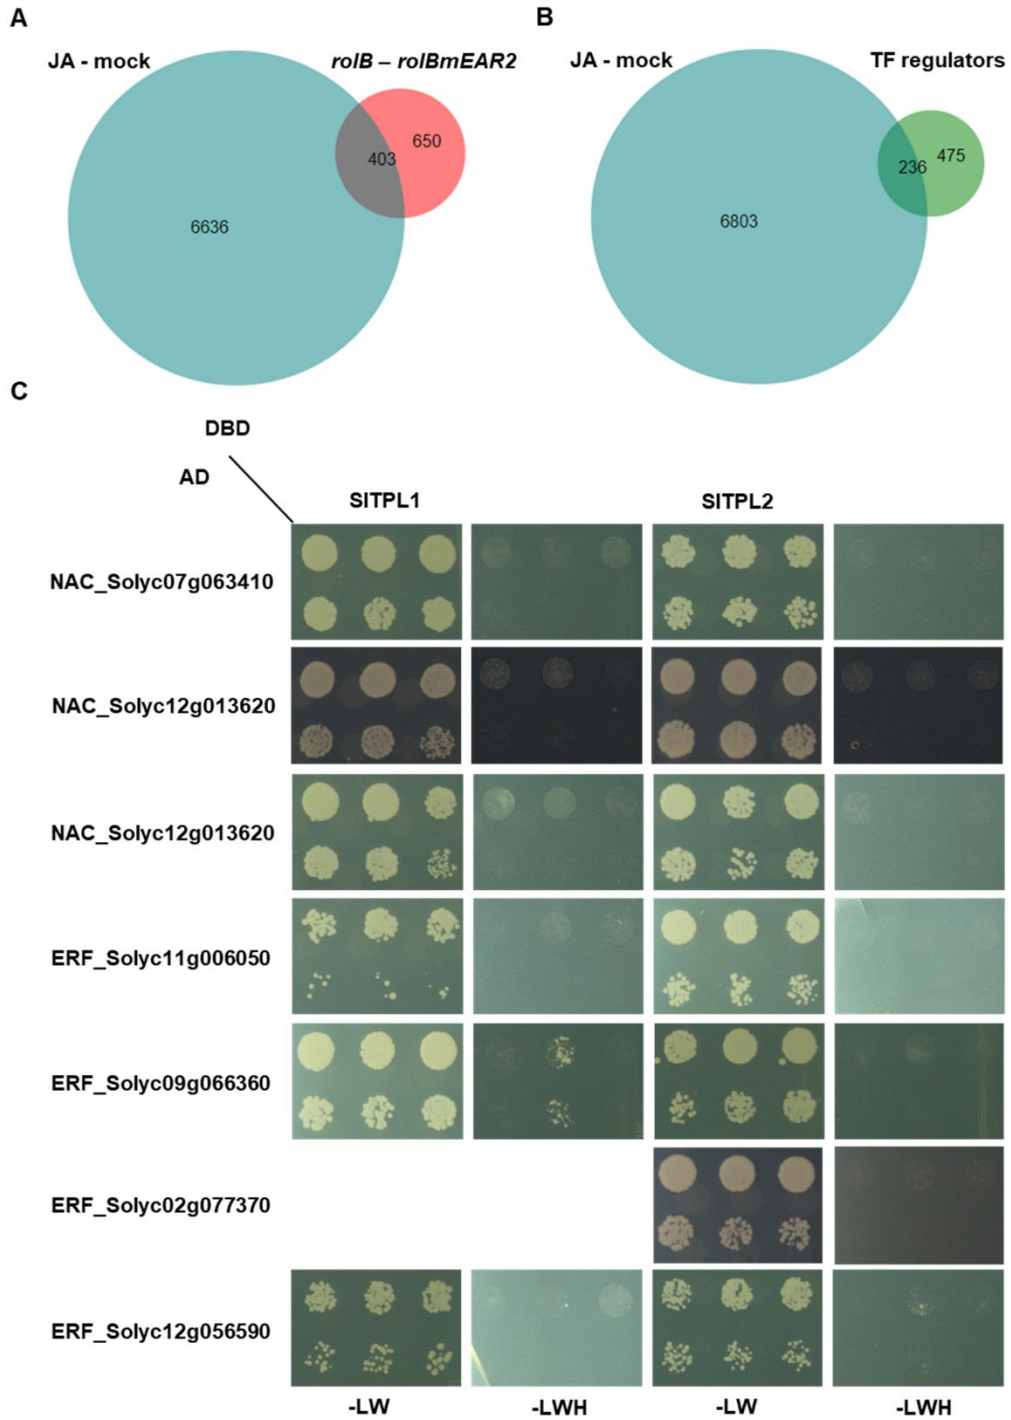

**Fig. S10.** *rolB*-activated genes enriched for NAC and AP/ERF TF binding targets. (A) Proportional Venn diagram showing overlap between DEGs upregulated in the contrast group *rolB-rolBmEAR2* and DEGs upregulated in tomato hairy roots treated with JA. (B) Proportional Venn diagram showing overlap between TF regulators of the DEGs upregulated in the contrast group *rolB-rolBmEAR2* and DEGs upregulated in tomato hairy roots treated with JA. (C) Y2H assay with SITPL1 and SITPL2 as baits and the NAC and AP/ERF TFs as preys. Y2H analysis was done as in Fig. 1.

**Table S1.** Primer sequences used in this study.

| Primer name               | Primer sequence                                                     | SolycID        | Species                   |
|---------------------------|---------------------------------------------------------------------|----------------|---------------------------|
| <i>Fw_attB1_rolB</i>      | GGGGACAAGTTTGTACAAAAAAGCAGGCTTAATGGCACTGAACTTGCCG                   | N/A            | <i>Agrobacterium K599</i> |
| <i>Rv_attB2_rolB</i>      | GGGGACCACTTTGTACAAGAAAGCTGGGTATCAAGTCGCCGAGGTTTCTTTC                | N/A            | <i>Agrobacterium K599</i> |
| <i>Fw_attB1_rolBΔEAR1</i> | GGGGACAAGTTTGTACAAAAAAGCAGGCTTAATGTTCCACAGTTATCCCCAAC               | N/A            | <i>Agrobacterium K599</i> |
| <i>Rv_attB2_rolBΔEAR2</i> | GGGGACCACTTTGTACAAGAAAGCTGGGTATCAGTCTGGCTCCGGTGACGG                 | N/A            | <i>Agrobacterium K599</i> |
| <i>Fw_attB1_rolBmEAR1</i> | GGGGACAAGTTTGTACAAAAAAGCAGGCTTAATGGCAGCTAACGCTCCGGCTTCCACAGTTATCCCC | N/A            | <i>Agrobacterium K599</i> |
| <i>Fw_rolBmEAR2</i>       | TCACCGGAGCCAGACGCTACCGCTCGGGCTTCGGGACCCAAC                          | N/A            | <i>Agrobacterium K599</i> |
| <i>Rv_rolBmEAR2</i>       | GTTGGGTCCCGAAGCCCGAGCGGTAGCGTCTGGCTCCGGTGA                          | N/A            | <i>Agrobacterium K599</i> |
| <i>Fw_attB1_SITPL1ΔN</i>  | GGGGACAAGTTTGTACAAAAAAGCAGGCTCCATGAAGTACTTTGAAGATGAAGTGCATAATGG     | N/A            | <i>Agrobacterium K599</i> |
| <i>Rv_attB2_SITPL1ΔN</i>  | GGGGACCACTTTGTACAAGAAAGCTGGGTTTCATCTTGGTGCTTGATCGGAGC               | N/A            | <i>Agrobacterium K599</i> |
| <i>Fw_attB1_NAC72</i>     | GGGGACAAGTTTGTACAAAAAAGCAGGCTTAATGGGTGTTCAAGAAATGGATC               | Solyc07g063410 | <i>S. lycopersicum</i>    |
| <i>Rv_attB2_NAC72</i>     | GGGGACCACTTTGTACAAGAAAGCTGGGTATTACCCAGTAAAACCCATATTTACTG            | Solyc07g063410 | <i>S. lycopersicum</i>    |
| <i>Fw_attB1_JA2</i>       | GGGGACAAGTTTGTACAAAAAAGCAGGCTTAATGGGTGTTCAAGAAAAAGATCC              | Solyc12g013620 | <i>S. lycopersicum</i>    |
| <i>Rv_attB2_JA2</i>       | GGGGACCACTTTGTACAAGAAAGCTGGGTACTACTGCTTGAACCCGAGATTTAAC             | Solyc12g013620 | <i>S. lycopersicum</i>    |
| <i>Fw_attB1_ERF2</i>      | GGGGACAAGTTTGTACAAAAAAGCAGGCTTAATGGATTCTTCATCTTCTCATCATC            | Solyc11g006050 | <i>S. lycopersicum</i>    |
| <i>Rv_attB2_ERF2</i>      | GGGGACCACTTTGTACAAGAAAGCTGGGTACTAGGAATTGCTTTCAGACAACATC             | Solyc11g006050 | <i>S. lycopersicum</i>    |
| <i>Fw_attB1_ERF_C3</i>    | GGGGACAAGTTTGTACAAAAAAGCAGGCTTAATGGATTATTCATCTCGGGATGATC            | Solyc09g066360 | <i>S. lycopersicum</i>    |
| <i>Rv_attB2_ERF_C3</i>    | GGGGACCACTTTGTACAAGAAAGCTGGGTATCACCAATTTGTGATACTTTCTGAAG            | Solyc09g066360 | <i>S. lycopersicum</i>    |
| <i>Fw_attB1_ERF_C5</i>    | GGGGACAAGTTTGTACAAAAAAGCAGGCTTAATGGTCCAACTCCTCAAAGTG                | Solyc02g077370 | <i>S. lycopersicum</i>    |
| <i>Rv_attB2_ERF_C5</i>    | GGGGACCACTTTGTACAAGAAAGCTGGGTATTAACATCTTGATTCAAATACATCATTAGTTCC     | Solyc02g077370 | <i>S. lycopersicum</i>    |
| <i>Fw_attB1_ERF_D2</i>    | GGGGACAAGTTTGTACAAAAAAGCAGGCTTAATGTCGGAGATGGTGACGG                  | Solyc12g056590 | <i>S. lycopersicum</i>    |
| <i>Rv_attB2_ERF_D2</i>    | GGGGACCACTTTGTACAAGAAAGCTGGGTATTAAC TAGAAGATGGAGGATATTGGCTAG        | Solyc12g056590 | <i>S. lycopersicum</i>    |
| <i>Fw_attB1_SITPL1</i>    | GGGGACAAGTTTGTACAAAAAAGCAGGCTCCATGTCATCTCTCAGTAGAGAGCTTG            | Solyc03g117360 | <i>S. lycopersicum</i>    |
| <i>Rv_attB2_SITPL1</i>    | GGGGACCACTTTGTACAAGAAAGCTGGGTTTCATCATCTTGGTGCTTGATCGGAG             | Solyc03g117360 | <i>S. lycopersicum</i>    |
| <i>Fw_attB1_SITPL2</i>    | GGGGACAAGTTTGTACAAAAAAGCAGGCTCCATGTCTTCTTGAGTAGGGAAGCTGG            | Solyc08g076030 | <i>S. lycopersicum</i>    |
| <i>Rv_attB2_SITPL2</i>    | GGGGACCACTTTGTACAAGAAAGCTGGGTCCTTGAAGGTGTTTCTGATGGCTG               | Solyc08g076030 | <i>S. lycopersicum</i>    |

|                               |                                                               |                |                           |
|-------------------------------|---------------------------------------------------------------|----------------|---------------------------|
| <i>Fw_attB1_SITPL3</i>        | GGGGACAAGTTTGTACAAAAAAGCAGGCTCCATGTCTTCTCTTAGCAGAGAATTGGTG    | Solyc01g100050 | <i>S. lycopersicum</i>    |
| <i>Rv_attB2_SITPL3</i>        | GGGGACCACTTTGTACAAGAAAGCTGGGTTCTTTGAACTTGGTCAGCAGCATG         | Solyc01g100050 | <i>S. lycopersicum</i>    |
| <i>Fw_attB1_SITPL4</i>        | GGGGACAAGTTTGTACAAAAAAGCAGGCTCCATGACTTCTTTAAGCAGAGAGCTGG      | Solyc03g116750 | <i>S. lycopersicum</i>    |
| <i>Rv_attB2_SITPL4</i>        | GGGGACCACTTTGTACAAGAAAGCTGGGTTCACTACCTTGATGCTTGATCAAGACC      | Solyc03g116750 | <i>S. lycopersicum</i>    |
| <i>Fw_attB1_SITPL5</i>        | GGGGACAAGTTTGTACAAAAAAGCAGGCTCCATGAGGCATTTTGTATGAAATGGTGG     | Solyc07g008040 | <i>S. lycopersicum</i>    |
| <i>Rv_attB2_SITPL5</i>        | GGGGACCACTTTGTACAAGAAAGCTGGGTTCACTACCTTTGAGGTTGATCTGAATTTGC   | Solyc07g008040 | <i>S. lycopersicum</i>    |
| <i>Fw_attB1_SITPL6</i>        | GGGGACAAGTTTGTACAAAAAAGCAGGCTCCATGTCTCTTAGTAAGGACCTTATATTCTTG | Solyc08g029050 | <i>S. lycopersicum</i>    |
| <i>Rv_attB2_SITPL6</i>        | GGGGACCACTTTGTACAAGAAAGCTGGGTTATTGGTTGCTCATTGGTAAGAGTC        | Solyc08g029050 | <i>S. lycopersicum</i>    |
| <i>Fw_attB1_SININJA</i>       | GGGGACAAGTTTGTACAAAAAAGCAGGCTCGCCACATCCCACCTACTG              | Solyc05g018320 | <i>S. lycopersicum</i>    |
| <i>Rv_attB2_SININJA</i>       | GGAAGGCCTATTGACAAGGAACCCAGCTTTCTTGTACAAAGTGGTCCCC             | Solyc05g018320 | <i>S. lycopersicum</i>    |
| <i>Fw_attB1_SIJAZ6</i>        | GGGGACAAGTTTGTACAAAAAAGCAGGCTTAATGGAGAGGGACTTTATGGG           | Solyc01g005440 | <i>S. lycopersicum</i>    |
| <i>Fw_attB1_SIJAZ6</i>        | GGGGACCACTTTGTACAAGAAAGCTGGGTACTAGGTCTCCTTACCGGCTAAC          | Solyc01g005440 | <i>S. lycopersicum</i>    |
| <i>Fw_attB1_SlbZIP11</i>      | GGGGACAAGTTTGTACAAAAAAGCAGGCTTAATGGCTGGTGACAATGACGAAG         | Solyc01g110480 | <i>S. lycopersicum</i>    |
| <i>Rv_attB2_SlbZIP11</i>      | GGGGACCACTTTGTACAAGAAAGCTGGGTACTACTTTGATTCATGCTTTG            | Solyc01g110480 | <i>S. lycopersicum</i>    |
| <i>Fw_attB1_SlbZIP30</i>      | ggggacaagtttgtaaaaaagcaggctccATGGACCCGAAGTTCACC               | Solyc04g071160 | <i>S. lycopersicum</i>    |
| <i>Rv_attB2_SlbZIP30</i>      | ggggaccactttgtacaagaaagctgggtcTCAACCCCTGTTATTGAAGTTCA         | Solyc04g071160 | <i>S. lycopersicum</i>    |
| <i>Fw_attB1_SlbZIP30ΔN179</i> | GGGGACAAGTTTGTACAAAAAAGCAGGCTTAATGTTGATTGATCCCAAGAGAGC        | Solyc04g071160 | <i>S. lycopersicum</i>    |
| <i>Fw_attB1_SlbZIP11ΔN416</i> | GGGGACAAGTTTGTACAAAAAAGCAGGCTTAATGTTAGCAGATCCAAAACGAG         | Solyc01g110480 | <i>S. lycopersicum</i>    |
| <i>Fw_SICAC</i> (qRT-PCR)     | CCTCCGTTGTGATGTAACCTGG                                        | Solyc08g006960 | <i>S. lycopersicum</i>    |
| <i>Rv_SICAC</i> (qRT-PCR)     | ATTGGTGGAAGTAACATCATCG                                        | Solyc08g006960 | <i>S. lycopersicum</i>    |
| <i>Fw_RolC</i> (qRT-PCR)      | CAGGCATCAGGATTCTTTGG                                          | N/A            | <i>Agrobacterium K599</i> |
| <i>Rv_RolC</i> (qRT-PCR)      | TGGCATAAAGGTGCAAGGTC                                          | N/A            | <i>Agrobacterium K599</i> |
| <i>Fw_RolA</i> (qRT-PCR)      | GGAAGTAGCCGGAATAAACG                                          | N/A            | <i>Agrobacterium K599</i> |
| <i>Rv_RolA</i> (qRT-PCR)      | ACACACGTTTGGCCTTCTTC                                          | N/A            | <i>Agrobacterium K599</i> |
| <i>Fw_RolB</i> (qRT-PCR)      | GACGGTTTTCTCCAAATCA                                           | N/A            | <i>Agrobacterium K599</i> |
| <i>Rv_RolB</i> (qRT-PCR)      | CCAACCTCACATCACAATGC                                          | N/A            | <i>Agrobacterium K599</i> |

## LEGENDS TO DATASETS

**Dataset S1.** Significantly enriched protein interactors of RolB identified by TurboID-mediated proximity labeling in tomato hairy roots. *eGFP* and *rolB* transgenic hairy roots were generated and processed for TurboID-mediated PL as previously described (Fig. S2). The Perseus software was used for the statistical data analysis (6, 7). The three biological TurboID replicate samples were grouped and a two-sample Student's *t* test (with settings  $S0 = 0.1$ , i.e., artificial within groups variance; this value defines the relative importance of the *P* value and difference between means);  $FDR = 0.01$  or  $FDR = 0.001$ ; and  $P$  value  $< 0.05$ ) was performed in Perseus to identify significantly enriched proteins in the RolB samples compared to the eGFP samples.  $\text{Log}_2(\text{difference})$ : the difference between the means of the imputed and  $\text{log}_2$  transformed label-free quantification (LFQ) intensity values from each sample group (RolB and eGFP sample group).  $-\log(P \text{ value})$ : significance of the observed difference.

**Dataset S2.** Differentially expressed genes in the contrast groups after RNA-seq analysis. RNA sequencing was performed on tomato roots infected with the WT K599 strain, the *rolBΔ* strain, and the *rolBΔ* strain with a construct expressing either the native *rolB* oncogene or the *rolBmEAR2* mutant, each under the control of the constitutive *CaMV35S* promoter. WT, wild-type K599-infected tomato root samples; *mrolb*, *rolBΔ*-infected tomato root samples; ROLB, *rolBΔ/35S::rolB*-infected tomato root samples; ROLBmEAR, *rolBΔ/35S::rolBmEAR2*-infected tomato root samples. Each sample group consists of four biological replicates. The data were filtered for low expressed genes that did not meet the following criteria: minimum read count in at least two samples  $> 5$  and count per million reads (CPM)  $> 1.5$ . RNA-seq read counts were normalized with the Trimmed Mean of M values method (TMM) (8). Models of expression contrasts were fitted with a generalized linear regression model. Genes were significantly differentially expressed in the contrast groups, when the *P* value  $< 0.05$ , the false discovery rate (FDR)  $< 0.05$ , and the  $\log(\text{FC}) > 2$  (upregulated) or  $< -2$  (downregulated) differentially expressed genes (DEGs). (A) Normalized RNA-seq read count per sample. (B) Number of significantly up- and downregulated DEGs in each contrast group. Significantly upregulated (C) and downregulated (D) DEGs in tomato root samples infected with ROLB vs WT. FC, fold-change; F, variance of the group means/mean of the within group variances; *P* value, significance of the observed difference. (E) GO categories significantly enriched in upregulated DEGs in tomato root samples infected with ROLB vs WT. GO term enrichment for biological process (BP), cellular component (CC), and molecular function (MF) was analyzed with PLAZA 4.5 Dicos.

**Dataset S3.** Differentially expressed genes in the contrast groups after RNA-seq analysis. RNA sequencing was performed on *rolB*, *rolBmEAR2*, and *GFP* transgenic tomato hairy root lines after 24 h of mock and  $\beta$ -estradiol (100  $\mu\text{M}$ ) treatment. C, mock-treated (control) samples; I,  $\beta$ -estradiol-induced samples. Each sample group consists of three biological replicates. One sample was removed from further analysis (*pRPS5 $\alpha$ \_XVE::rolB*, line 7) due to divergent correlation coefficients. The data was filtered for low expressed genes that did not meet the following criteria: minimum read count in at least two samples  $> 25$  and count per million reads (CPM)  $> 1.5$ . RNA-seq read count were normalized with the Trimmed Mean of M values method (TMM) (8). Models of expression contrasts were fitted with a generalized linear regression model. Genes were significantly differentially expressed in the contrast groups; when the *P* value  $< 0.05$ , false discovery rate (FDR)  $< 0.05$ , and  $\log(\text{FC}) > 2$  (upregulated DEGs) or  $< -2$  (downregulated DEGs). (A) Normalized RNA-seq read count per sample. (B) Number of significantly up- and downregulated DEGs in each contrast group.



(C) Significantly upregulated DEGs in *rolB* compared to *GFP* transgenic hairy root lines. (D) Significantly downregulated DEGs in *rolB* compared to *GFP* transgenic hairy root lines. (E) Significantly upregulated DEGs in *rolB* compared to *rolBmEAR2* transgenic hairy root lines. (F) Significantly downregulated DEGs in *rolB* compared to *rolBmEAR2* transgenic hairy root lines. FC, fold-change; F, variance of the group means/mean of the within group variances; *P* value, significance of the observed difference.

**Dataset S4.** GO categories enriched in differentially expressed genes (DEGs) of each contrast group. GO term enrichment for biological process (BP), cellular component (CC), and molecular function (MF) was analyzed with PLAZA 4.5 Dicots. GO categories significantly enriched in (A) upregulated and (B) downregulated DEGs in *rolB* compared to *GFP* transgenic hairy root lines. GO categories significantly enriched in (C) upregulated and (D) downregulated DEGs in *rolB* compared to *rolBmEAR2* transgenic hairy root lines. The cut-off *P* value and FDR were <0.05. (E) Upregulated DEGs in *rolB* compared to *rolBmEAR2* transgenic hairy root lines categorized in the GO category ‘response to ethylene’. (F) Upregulated DEGs in *rolB* compared to *rolBmEAR2* transgenic hairy root lines categorized in the GO category ‘response to jasmonic acid’.

**Dataset S5.** TF-binding sites enriched in differentially expressed genes (DEGs) between *rolB* and *rolBmEAR2*. Binding sites significantly enriched in (A) upregulated and (B) downregulated DEGs in *rolB* compared to *rolBmEAR2* transgenic hairy root lines. Each row contains the enrichment statistics of the corresponding binding site (original binding site IDs from CisBP) (9) and JASPAR (10) along with information of the associated TFs, Arabidopsis orthologs, and expression values in *rolB* and *rolBmEAR2*. Set ID, identifier for the set of input genes for which we want to predict potential regulators; binding site ID, identifier of the binding site predicted to be enriched in the promoters of the genes in the set; *P* value, significance of the enrichment of the binding site in the promoters of the genes in the set; *Q* value, *P* value after correction for multiple testing; enrichment fold, how higher is the enrichment of the binding site in the promoters of the genes in the set than expected by chance; number of genes of interest, how many genes there are on the input gene set; number of genes targeted by binding site, how many genes are targeted by the binding site in the whole genome; percentage of genes targeted by binding site, percentage of genes targeted by the binding site divided by all the genes in the genome; number of hits, how many of the total genes targeted by the binding site are present in the input gene set; gene ID, gene ID of the transcription factor (TF) associated to the binding site predicted as enriched (can be more than one per binding site); TF description, description of the TF by Sol Genomics (<https://solgenomics.net/>); binding site family, TF family to which the enriched binding site is characteristic; Arabidopsis ortholog gene ID, gene ID of the corresponding tomato TF in Arabidopsis; Arabidopsis ortholog gene symbol, gene symbol of the corresponding Arabidopsis ortholog; logFC of the TF, log fold-change of the TF predicted as regulator of the gene set, if this one is among the differentially expressed genes (up- or downregulated); up- or downregulated, column specifying whether the corresponding TF is up- or downregulated; target genes, gene ID of the genes targeted by the enriched binding site and present in the input gene set.

**Dataset S6.** Upregulated differentially expressed genes in tomato hairy roots upon JA treatment. RNA sequencing was done on control tomato hairy root lines 24 h after mock and 50  $\mu$ M JA treatments. Each sample group consists of three biological replicates. RNA-seq read counts were normalized with Trimmed Mean of M-values method (TMM) (8). Models of expression contrasts were fitted with a generalized linear

regression model. Genes were significantly differentially expressed in the contrast group, when the  $P$  value and FDR  $< 0.05$ . FC, fold-change; CPM, count per million reads;  $F$ , variance of the group means/mean of the within group variances;  $P$  value, significance of the observed difference; FDR, false discovery rate.

## SI REFERENCES

1. A. Pérez Cuéllar, L. Pauwels, R. De Clercq, A. Goossens, Yeast two-hybrid analysis of jasmonate signaling proteins. *Methods Mol. Biol.* **1011**, 173-185 (2013).
2. V. De Sutter *et al.*, Exploration of jasmonate signalling via automated and standardized transient expression assays in tobacco cells. *Plant J.* **44**, 1065-1076 (2005).
3. T. Ho-Plágaro, R. Huertas, M. I. Tamayo-Navarrete, J. A. Ocampo, J. M. García-Garrido, An improved method for *Agrobacterium rhizogenes*-mediated transformation of tomato suitable for the study of arbuscular mycorrhizal symbiosis. *Plant Methods* **14**, 34 (2018).
4. S. D. Rodrigues *et al.*, Efficient CRISPR-mediated base editing in *Agrobacterium* spp. *Proc. Natl. Acad. Sci. USA* **118**, e2013338118 (2021).
5. S. Wen-jun, B. G. Forde, Efficient transformation of *Agrobacterium* spp. by high voltage electroporation. *Nucleic Acids Res.* **17**, 8385-8385 (1989).
6. J. Cox, M. Mann, MaxQuant enables high peptide identification rates, individualized p.p.b.-range mass accuracies and proteome-wide protein quantification. *Nat. Biotechnol.* **26**, 1367-1372 (2008).
7. S. Tyanova, T. Temu, J. Cox, The MaxQuant computational platform for mass spectrometry-based shotgun proteomics. *Nat. Protoc.* **11**, 2301-2319 (2016).
8. M. D. Robinson, A. Oshlack, A scaling normalization method for differential expression analysis of RNA-seq data. *Genome Biol.* **11**, R25 (2010).
9. M. T. Weirauch *et al.*, Determination and inference of eukaryotic transcription factor sequence specificity. *Cell* **158**, 1431-1443 (2014).
10. O. Fornes *et al.*, JASPAR 2020: update of the open-access database of transcription factor binding profiles. *Nucleic Acids Res.* **48**, D87-D92 (2020).
